# Supplementary material
Source: publisher figshare collection journal article supplement (https://sage.figshare.com/ndownloader/files/23134106)
Supplement: Supplementary file 1 [file 23134106]

Table S1.

*Bivariate Correlations between All PTRS Variables and Peer Victimization*

|                              | 1.     | 2.     | 3.     | 4.     | 5.   |
|------------------------------|--------|--------|--------|--------|------|
| 1. PTRS – contact parents    | -      |        |        |        |      |
| 2. Separate students         | .46*** | -      |        |        |      |
| 3. Advise independent coping | .10    | .15**  | -      |        |      |
| 4. Advise avoidance          | .42*** | .51*** | .15**  | -      |      |
| 5. Advise assertion          | .41*** | .37*** | .31*** | .53*** | -    |
| 6. Peer victimization        | -.06   | -.04   | .19*** | -.07   | -.04 |

\*  $p < .05$ . \*\*  $p < .01$ . \*\*\*  $p < .001$ .

Table S2.

*Correlations between the Outcome Variables and Perceived Teacher Responses and Peer Victimization*

|                              | PU.  | CP   | SS   | AIC     | AAv  | AAAs | PV      |
|------------------------------|------|------|------|---------|------|------|---------|
| Wave 1 physical aggression   | .07  | -.07 | -.03 | .15**   | -.06 | .00  | .59***  |
| Wave 2 physical aggression   | .01  | -.07 | -.05 | .17**   | -.07 | -.02 | .53***  |
| Wave 3 physical aggression   | .01  | -.02 | .01  | .16**   | -.01 | .03  | .44***  |
| Wave 4 physical aggression   | .04  | -.01 | -.01 | .14*    | .01  | .03  | .45***  |
| Wave 1 relational aggression | .00  | -.05 | -.03 | .19***  | .01  | .03  | .64***  |
| Wave 2 relational aggression | -.01 | .01  | -.02 | .16**   | -.03 | .02  | .52***  |
| Wave 3 relational aggression | .00  | -.03 | .01  | .15**   | .01  | .04  | .45***  |
| Wave 4 relational aggression | .01  | .03  | .01  | .10     | .10  | .04  | .35***  |
| Wave 1 prosocial behavior    | -.07 | .00  | .04  | -.09    | .12* | .08  | -.51*** |
| Wave 2 prosocial behavior    | .05  | -.01 | .03  | -.16**  | .05  | .00  | -.51*** |
| Wave 3 prosocial behavior    | .03  | .07  | .07  | -.19*** | .09  | .03  | -.48*** |
| Wave 4 prosocial behavior    | -.01 | -.04 | .04  | -.17**  | .00  | .02  | -.41*** |
| Wave 1 depressive symptoms   | .01  | -.10 | -.01 | .11*    | -.06 | -.06 | .24***  |
| Wave 2 depressive symptoms   | .01  | -.05 | .02  | .11*    | .04  | .02  | .02     |
| Wave 3 depressive symptoms   | -.03 | .06  | .04  | .07     | .03  | -.01 | .14*    |
| Wave 4 depressive symptoms   | .03  | -.03 | -.05 | .06     | .01  | -.03 | .11     |
| Wave 1 anxiety               | .08  | .01  | .04  | .07     | .06  | .03  | .12*    |
| Wave 2 anxiety               | .04  | .00  | .04  | .13*    | .04  | .04  | .09     |
| Wave 3 anxiety               | -.01 | .08  | .06  | .07     | .06  | .00  | .01     |
| Wave 4 anxiety               | .08  | .00  | .04  | -.01    | .03  | -.03 | -.03    |

\*  $p < .05$ . \*\*  $p < .01$ . \*\*\*  $p < .001$ .

Table S3

*Correlations among All Behavioral Outcomes from Wave 1 through Wave 4*

|                             | 1.   | 2.   | 3.   | 4.   | 5.   | 6.   | 7.   | 8.   | 9.  | 10. | 11. |
|-----------------------------|------|------|------|------|------|------|------|------|-----|-----|-----|
| 1. W1 physical aggression   | ---  |      |      |      |      |      |      |      |     |     |     |
| 2. W2 physical aggression   | .75  | ---  |      |      |      |      |      |      |     |     |     |
| 3. W3 physical aggression   | .66  | .61  | ---  |      |      |      |      |      |     |     |     |
| 4. W4 physical aggression   | .59  | .57  | .68  | ---  |      |      |      |      |     |     |     |
| 5. W1 relational aggression | .80  | .67  | .54  | .49  | ---  |      |      |      |     |     |     |
| 6. W2 relational aggression | .57  | .75  | .48  | .47  | .67  | ---  |      |      |     |     |     |
| 7. W3 relational aggression | .58  | .55  | .79  | .60  | .50  | .55  | ---  |      |     |     |     |
| 8. W4 relational aggression | .46  | .45  | .55  | .73  | .50  | .52  | .61  | ---  |     |     |     |
| 9. W1 prosocial behavior    | -.66 | -.61 | -.56 | -.51 | -.62 | -.55 | -.55 | -.46 | --- |     |     |
| 10. W2 prosocial behavior   | -.54 | -.69 | -.45 | -.41 | -.60 | -.68 | -.43 | -.35 | .61 | --- |     |
| 11. W3 prosocial behavior   | -.54 | -.55 | -.79 | -.57 | -.45 | -.46 | -.68 | -.54 | .54 | .41 | --- |
| 12. W4 prosocial behavior   | -.46 | -.51 | -.61 | -.72 | -.41 | -.43 | -.56 | -.71 | .59 | .46 | .61 |

*Note.* All correlations significant at  $p < .001$ .

Table S4

*Correlations Depressive Symptoms and Anxiety from Wave 1 through Wave 4*

|                           | 1.     | 2.     | 3.     | 4.     | 5.     | 6.     | 7.     |
|---------------------------|--------|--------|--------|--------|--------|--------|--------|
| 1. W1 depressive symptoms | ---    |        |        |        |        |        |        |
| 2. W2 depressive symptoms | .32*** | ---    |        |        |        |        |        |
| 3. W3 depressive symptoms | .25*** | .35*** | ---    |        |        |        |        |
| 4. W4 depressive symptoms | .23*** | .26*** | .37*** | ---    |        |        |        |
| 5. W1 anxiety             | .51*** | .35*** | .27*** | .30*** | ---    |        |        |
| 6. W2 anxiety             | .24*** | .63*** | .29*** | .26*** | .43*** | ---    |        |
| 7. W3 anxiety             | .12*   | .35*** | .51*** | .38*** | .37*** | .42*** | ---    |
| 8. W4 anxiety             | .14*   | .34*** | .32*** | .61*** | .39*** | .39*** | .53*** |

\*  $p < .05$ . \*\*  $p < .01$ . \*\*\*  $p < .001$ .

Table S5.

*Fit Indices for Final Latent Growth Curve Models Estimated for Contact Parents*

| Outcome variable      | $\chi^2$ (df) | CFI  | RMSEA | SRMR |
|-----------------------|---------------|------|-------|------|
| Physical aggression   | 9.27 (19)     | 1.00 | .000  | .022 |
| Relational aggression | 39.79 (19)    | .95  | .055  | .028 |
| Prosocial behavior    | 34.73 (18)    | .96  | .050  | .068 |
| Depressive symptoms   | 18.32 (8)     | .94  | .059  | .023 |
| Anxiety               | 21.38 (19)    | .99  | .018  | .018 |

Table S6.

*Fit Indices for Final Latent Growth Curve Models Estimated for Separate Students*

| Outcome variable      | $\chi^2$ (df) | CFI  | RMSEA | SRMR |
|-----------------------|---------------|------|-------|------|
| Physical aggression   | 14.88 (19)    | 1.00 | .000  | .022 |
| Relational aggression | 35.73 (19)    | .96  | .049  | .024 |
| Prosocial behavior    | 29.98 (18)    | .97  | .043  | .062 |
| Depressive symptoms   | 17.64 (8)     | .94  | .057  | .021 |
| Anxiety               | 10.37 (19)    | 1.00 | .000  | .013 |

Table S7.

*Fit Indices for Final Latent Growth Curve Models Estimated for Advise Independent Coping*

| Outcome variable      | $\chi^2$ (df) | CFI  | RMSEA | SRMR |
|-----------------------|---------------|------|-------|------|
| Physical aggression   | 9.26 (19)     | 1.00 | .000  | .021 |
| Relational aggression | 40.43 (19)    | .95  | .056  | .028 |
| Prosocial behavior    | 20.34 (18)    | .98  | .040  | .062 |
| Depressive symptoms   | 17.66 (8)     | .93  | .057  | .021 |
| Anxiety               | 24.67 (19)    | .98  | .029  | .025 |

Table S8.

*Fit Indices for Final Latent Growth Curve Models Estimated for Advise Avoidance*

| Outcome variable      | $\chi^2$ (df) | CFI  | RMSEA | SRMR |
|-----------------------|---------------|------|-------|------|
| Physical aggression   | 14.13 (19)    | .94  | .000  | .022 |
| Relational aggression | 47.60 (19)    | .95  | .064  | .029 |
| Prosocial behavior    | 28.80 (18)    | .98  | .040  | .068 |
| Depressive symptoms   | 17.26 (8)     | .94  | .056  | .022 |
| Anxiety               | 14.31 (19)    | 1.00 | .000  | .016 |

Table S9.

*Fit Indices for Final Latent Growth Curve Models Estimated for Advise Assertion*

| Outcome variable      | $\chi^2$ (df) | CFI  | RMSEA | SRMR |
|-----------------------|---------------|------|-------|------|
| Physical aggression   | 9.92 (19)     | 1.00 | .000  | .023 |
| Relational aggression | 44.77 (19)    | .94  | .061  | .029 |
| Prosocial behavior    | 31.22 (18)    | .97  | .045  | .068 |
| Depressive symptoms   | 17.42 (8)     | .94  | .057  | .023 |
| Anxiety               | 20.09 (19)    | 1.00 | .013  | .016 |

Table S10.

*Unstandardized Coefficients Predicting Adjustment from Perceived Teacher Contact Parents*

| Predictor                                   | Physical Agg. |         | Relational Agg. |         | Prosocial Beh. |       | Depressive. Symptoms |            |             | Anxiety   |       |
|---------------------------------------------|---------------|---------|-----------------|---------|----------------|-------|----------------------|------------|-------------|-----------|-------|
|                                             | Intercept     | Slope   | Intercept       | Slope   | Intercept      | Slope | Intercept            | Lin. Slope | Quad. Slope | Intercept | Slope |
| Contact parents                             | -.03          | .00     | -.01            | .01     | -.02           | .00   | -.22                 | .21*       | -.06*       | .06       | .02   |
| Victimization                               | .87***        | -.05    | .76***          | -.07*   | -.86***        | .05   | .67***               | -.35*      | .11*        | .30*      | -.05  |
| Sex                                         | -.15***       | -.04*   | -.02            | -.02    | .13**          | .03   | .15                  | .04        | -.01        | .20*      | .01   |
| Contact parents<br>× victimization          | -.14          | .03     | -.03            | .04     | .18            | -.07  | -.35                 | .29        | -.07        | -.12      | .06   |
| Contact parents<br>× sex                    | .02           | .02     | .01             | .01     | .01            | -.02  | .14                  | -.27       | .08         | -.03      | -.05  |
| Victim × sex                                | -.39          | .01     | -.06            | -.04    | .28            | -.01  | -.10                 | -.34       | .10         | .21       | -.18  |
| Contact parents<br>× victimization<br>× sex | .20           | .04     | .01             | .05     | -.34           | .02   | .69*                 | -.89*      | .28*        | .46*      | -.19* |
| Unexplained<br>variance                     | .065***       | .007*** | .038***         | .006*** | .058***        | .004  | .232**               | .18*       | .008        | .15***    | .012* |

*Note.* Agg. = aggression. Beh. = behavior. Lin. = linear. Quad. = quadratic.

Table S11.

*Unstandardized Coefficients Predicting Adjustment from Perceived Teacher Separate Students*

| Predictor                                     | Physical Agg. |         | Relational Agg. |         | Prosocial Beh. |       | Depressive Symptoms |            |             | Anxiety   |       |
|-----------------------------------------------|---------------|---------|-----------------|---------|----------------|-------|---------------------|------------|-------------|-----------|-------|
|                                               | Intercept     | Slope   | Intercept       | Slope   | Intercept      | Slope | Intercept           | Lin. Slope | Quad. Slope | Intercept | Slope |
| Separate students                             | .05           | -.01    | .05             | .00     | -.03           | .02   | -.07                | .00        | -.01        | .19*      | -.01  |
| Victimization                                 | .83***        | -.03    | .72***          | -.06*   | -.84***        | .04   | .65***              | -.30       | .09         | .32       | -.06  |
| Sex                                           | -.15***       | -.04**  | -.03            | -.02    | .14**          | .03   | .15                 | .08        | -.03        | .19*      | .01   |
| Separate students<br>× victimization          | -.35**        | .11*    | -.31**          | .08*    | .26*           | -.09  | -.21                | .42        | -.14*       | .08       | -.02  |
| Separate students<br>× sex                    | -.06          | .02     | -.07            | .01     | .05            | -.03  | .16                 | .06        | -.02        | .10       | .00   |
| Victim × sex                                  | -.33          | -.04    | -.03            | -.07    | .29            | .01   | -.10                | -.12       | .02         | -.22      | -.14  |
| Separate students<br>× victimization ×<br>sex | .53***        | -.16*   | .28             | -.05    | -.38           | .09   | .50                 | -.24       | .05         | .19       | -.11  |
| Unexplained<br>variance                       | .059***       | .006*** | .034***         | .005*** | .055***        | .004  | .240**              | .020*      | .010        | .148***   | .013* |

*Note.* Agg. = aggression. Beh. = behavior. Lin. = linear. Quad. = quadratic.



Table S12

*Unstandardized Coefficients Predicting Adjustment from Perceived Teacher Advocate Independent Coping*

| Predictor                                | Physical Agg. |         | Relational Agg. |         | Prosocial Beh. |         | Depressive symptoms |            |             | Anxiety   |       |
|------------------------------------------|---------------|---------|-----------------|---------|----------------|---------|---------------------|------------|-------------|-----------|-------|
|                                          | Intercept     | Slope   | Intercept       | Slope   | Intercept      | Slope   | Intercept           | Lin. Slope | Quad. Slope | Intercept | Slope |
| Independent coping                       | .03           | .00     | .06**           | -.01    | .06**          | -.01    | .01                 | .15        | -.05        | .06       | .01   |
| Victimization                            | .84***        | -.06    | .73***          | -.08*   | .73***         | -.08*   | .64***              | -.37*      | .12***      | .27*      | -.04  |
| Sex                                      | -.17***       | -.04*   | -.03            | -.02    | -.03           | -.02    | .14                 | .06        | -.03        | .17*      | .02   |
| Independent coping × victimization       | .11           | .03     | -.01            | .03     | -.01           | .03     | .11                 | -.18       | .02         | .09       | -.07  |
| Independent coping × sex                 | -.02          | .00     | .01             | .01     | -.05           | .01     | .10                 | -.24       | .08         | .03       | -.05  |
| Victim × sex                             | -.37          | -.02    | -.08            | -.08    | .01            | -.08    | -.25                | -.08       | .01         | .10       | -.11  |
| Independent coping × victimization × sex | .03           | .08     | .47***          | -.15*** | .47*           | -.15**  | -.49                | -.04       | .14         | .09       | .00   |
| Unexplained variance                     | .064***       | .007*** | .036***         | .006*** | .036***        | .006*** | .238**              | .194*      | .009        | .146***   | .012* |

*Note.* Agg. = aggression. Beh. = behavior. Lin. = linear. Quad. = quadratic.

Table S13.

*Unstandardized Coefficients Predicting Adjustment from Perceived Teacher Advise Avoidance*

| Predictor                                | Physical Agg. |         | Relational Agg. |         | Prosocial Beh. |        | Depressive Symptoms |            |             | Anxiety   |       |
|------------------------------------------|---------------|---------|-----------------|---------|----------------|--------|---------------------|------------|-------------|-----------|-------|
|                                          | Intercept     | Slope   | Intercept       | Slope   | Intercept      | Slope  | Intercept           | Lin. Slope | Quad. Slope | Intercept | Slope |
| Advocate avoidance                       | -.02          | .00     | .02             | .00     | .04            | .00    | -.07                | .02        | .00         | .01       | -.01  |
| Victimization                            | .83***        | -.02    | .72***          | -.06    | -.80***        | .02    | .65***              | -.29       | .09         | .34*      | -.08  |
| Sex                                      | -.15***       | -.04*   | -.01            | -.02    | .13**          | .03    | .14                 | .05        | -.02        | .19*      | .01   |
| Advocate avoidance × victimization       | -.17          | .09*    | -.16            | .07*    | .22**          | -.11** | -.06                | .22        | -.07        | .14       | -.08  |
| Advocate avoidance × sex                 | .05           | .00     | .02             | .02     | -.04           | -.02   | .09                 | .06        | -.02        | .09       | .01   |
| Victim × sex                             | -.30          | -.05    | .03             | -.08    | .17            | .03    | -.13                | -.26       | .08         | .20       | -.13  |
| Advocate avoidance × victimization × sex | .39*          | -.10*   | .35*            | -.06    | -.59***        | .13**  | .33                 | -.67       | .24         | .29       | -.07  |
| Unexplained variance                     | .062***       | .007*** | .037***         | .006*** | .053***        | .004   | .247**              | .200*      | .009        | .146***   | .012* |

*Note.* Agg. = aggression. Beh. = behavior. Symp. = symptoms. Lin. = linear. Quad. = quadratic.

Table S14.

*Unstandardized Coefficients Predicting Adjustment from Perceived Teacher Advise Assertion*

| Predictor                                | Physical Agg. |         | Relational Agg. |         | Prosocial Beh. |         | Depressive symptoms |            |             | Anxiety   |       |
|------------------------------------------|---------------|---------|-----------------|---------|----------------|---------|---------------------|------------|-------------|-----------|-------|
|                                          | Intercept     | Slope   | Intercept       | Slope   | Intercept      | Slope   | Intercept           | Lin. Slope | Quad. Slope | Intercept | Slope |
| Advocate assertion                       | -.02          | .00     | .02             | -.01    | .06            | .00     | -.06                | .06        | -.02        | .01       | -.01  |
| Victimization                            | .88***        | -.06    | .76***          | -.08*   | -.90***        | .07     | .69***              | -.36*      | .12**       | .30*      | -.03  |
| Sex                                      | -.15***       | -.04    | -.01            | -.02    | .13**          | .03     | .13                 | .07        | -.02        | .19*      | .02   |
| Advocate assertion × victimization       | .07           | .08     | .04             | .04     | .13            | -.12*** | -.05                | -.02       | -.03        | .02       | -.18* |
| Advocate assertion × sex                 | .05           | .01     | .02             | .03     | -.08           | -.01    | .03                 | -.01       | .00         | .08       | -.02  |
| Victim × sex                             | -.37          | .00     | -.02            | -.05    | .31            | -.02    | -.25                | -.10       | .02         | .21       | -.17  |
| Advocate assertion × victimization × sex | .13           | -.08    | .14             | -.03    | -.45           | .12     | .05                 | -.12       | .13         | .31       | .16   |
| Unexplained variance                     | .064***       | .007*** | .038***         | .006*** | .058***        | .004    | .250**              | .210*      | .010        | .147***   | .01   |

*Note.* Agg. = aggression. Beh. = behavior. Lin. = linear. Quad. = quadratic.
